# Supplementary material
Source: Springer Nature journal article supplement (https://www.springermedizin.de/resource/supplementary/12943_2012_1085_MOESM5_ESM.pdf/9552410)

# H82

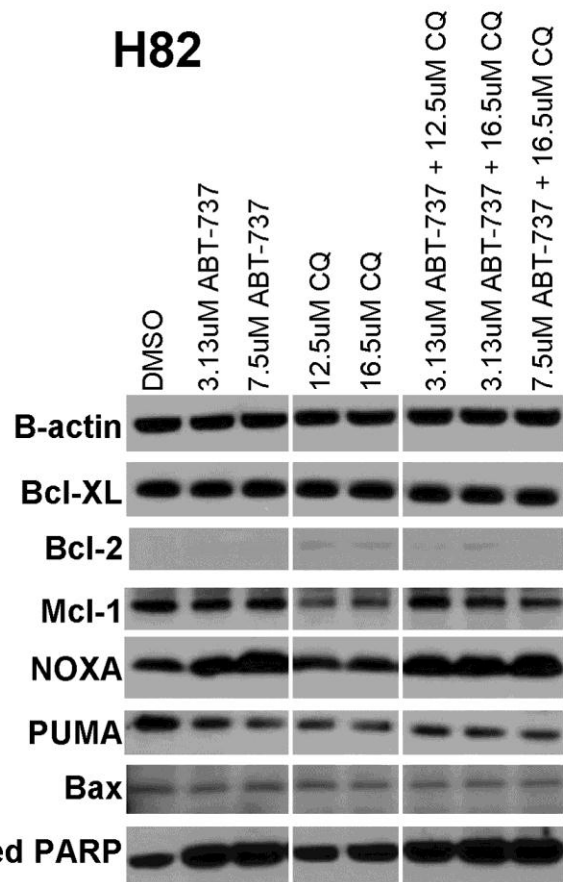

# H209

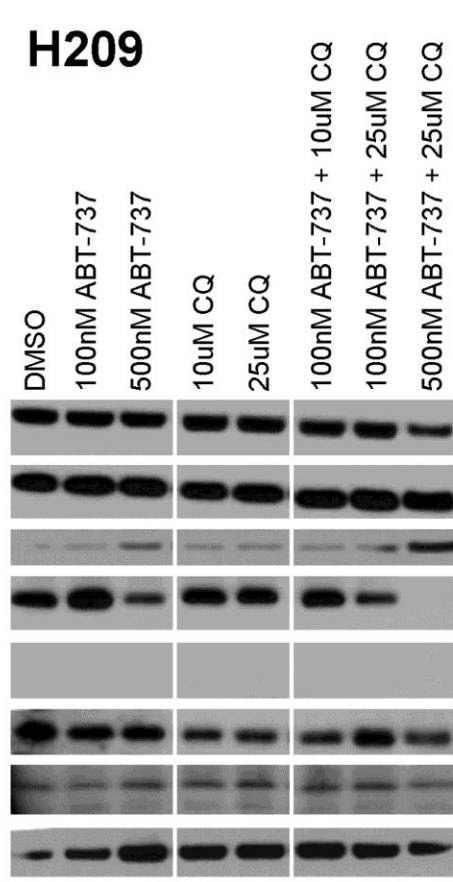

# H345

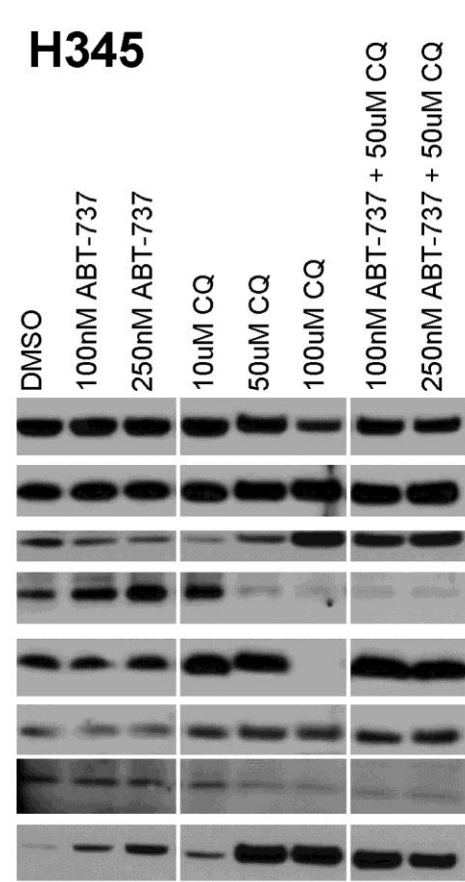

Supplement: MOESM5 [file 9552410]
